# Supplementary material
Source: publisher figshare collection journal article supplement (https://frontiersin.figshare.com/ndownloader/files/35052313)
Supplement: Supplementary file 1 [file 35052313]

Supplementary Material

## Supplementary Figures

**Figure. 1.** Structure of the complete system**.**

**Figure. 2.** Proposed system structure.

**Figure. 3.** Structure of the proposed seven-level Multilevel Inverter.

(a) (b) (c)

(d) (e) (f)

(g) (h)

**Figure. 4**. Operation mode of the seven-level multilevel inverter.


(a) (b)

**Figure.** 5. DC-DC part operation modes(a) active state, switch is turned on, (b) zero state, switch is turned off.

**Figure. 6.** Converter voltage gain


(a) (b)

**Figure. 7.** Control system structure (a)control system block diagram. (b) level Shift Pulse Width Modulation for the new 7 level boost converter.

**Figure. 8**. Switching pattern of the multilevel inverter over one switching cycle.

**Figure.9.** PV Output voltage, current, and power with gradual change in solar radiation(a) PV power, (b) Solar radiation, (c) PV current, and (d) PV voltage.

(a) (b)

**Figure. 10.** inverter output characteristics with resistive load(a) and inverter output characteristics with inductive(b)

**Fig. 11.** System results under grid integration

(a) (b)

**Figure. 12.** Output Characteristics with resistive load (a) and output Characteristics with inductive load (b).
